# Supplementary material for: Recognition Dynamics of Cancer Mutations on the ERp57-Tapasin Interface
Source: MDPI journal article supplement (doi:10.3390/cancers12030737), 2020-03-20

# Supplementary Materials: Recognition Dynamics of Cancer Mutations on the ERp57-Tapasin Interface

Monikaben Padariya, Umesh Kalathiya, Douglas R. Houston and Javier Antonio Alfaro

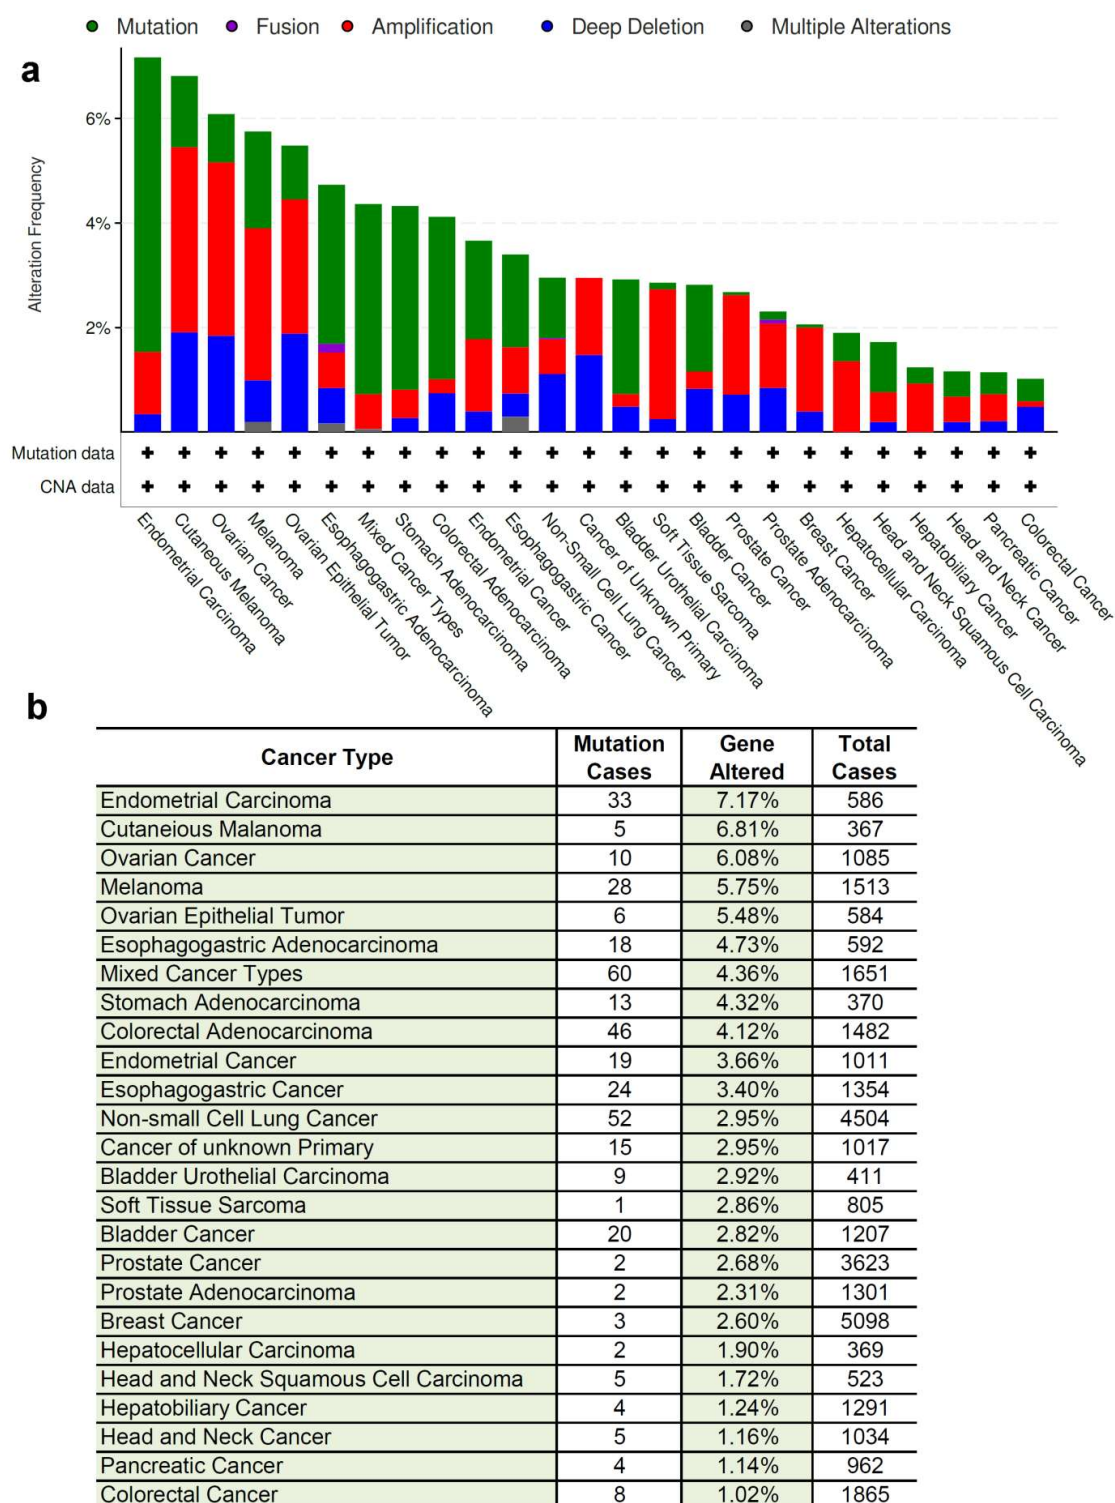

**Figure S1.** The PDIA3(ERp57) and TAPBP(tapasin) genes altered in different cancer types. (**a** and **b**) Data retrieved from the cBioPortal database (Cancer Discov. 2012, 2, 401-404), and in the cBioPortal the search was limited to 300 total cases and the minimum gene altered in 1%.

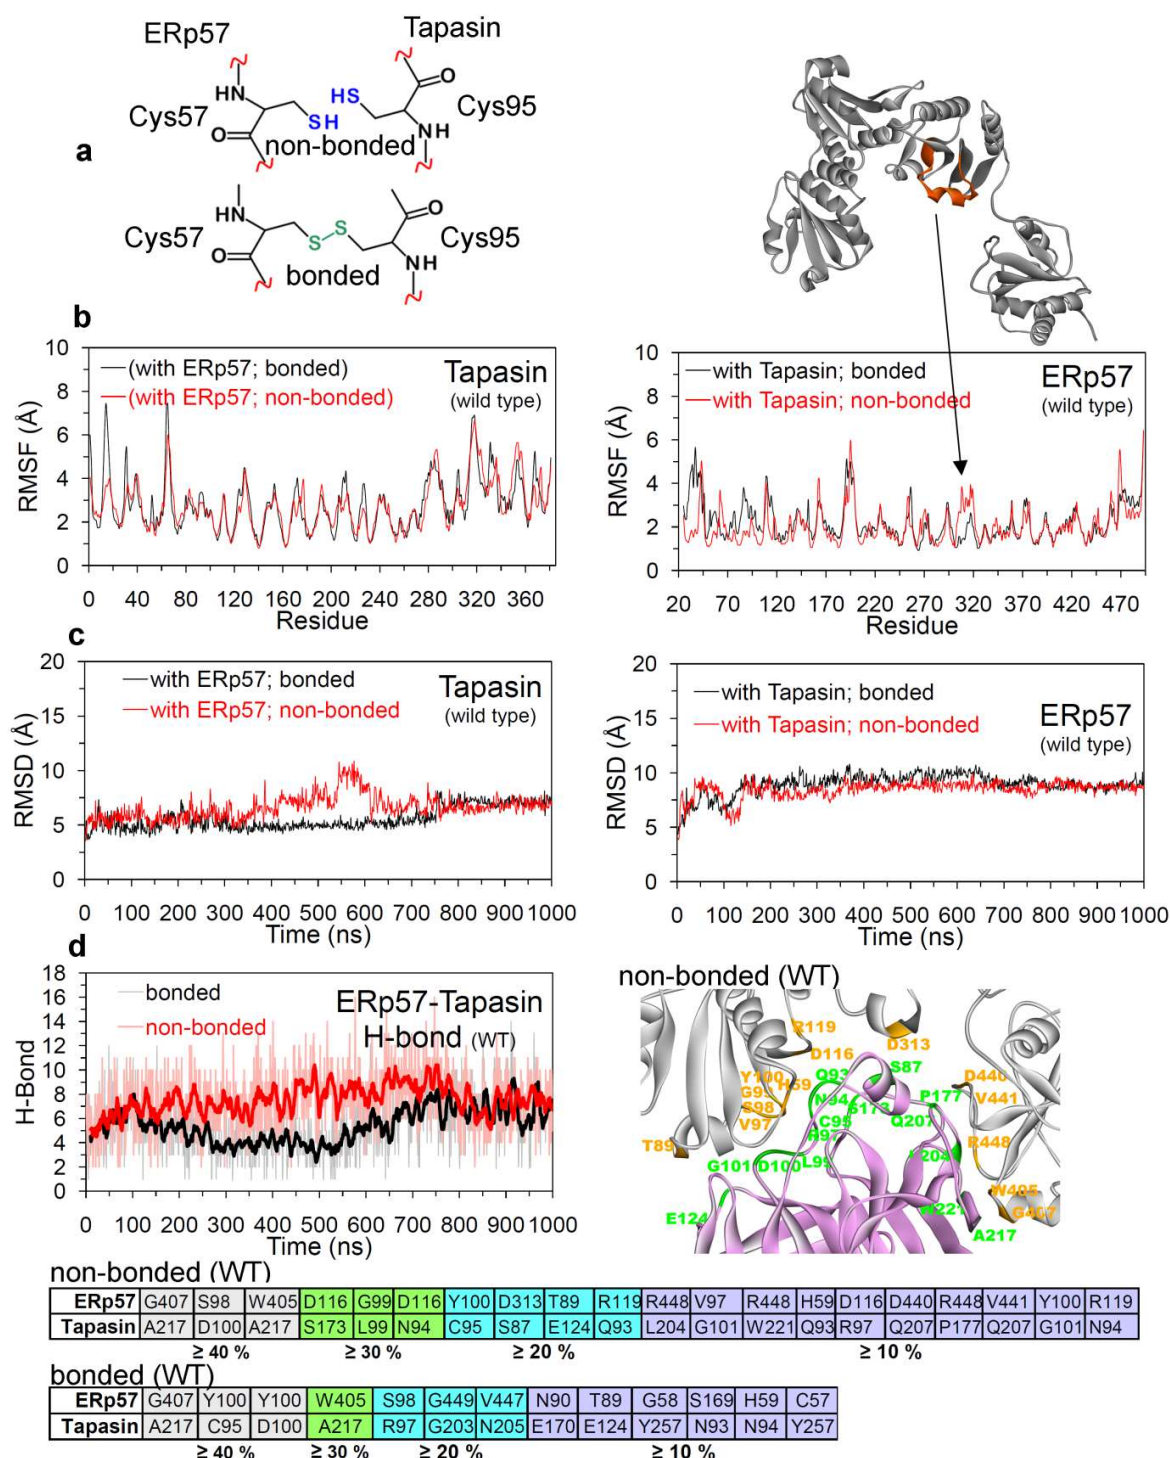

**Figure S2.** Cys57-Cys95 disulphide bonded and non-bonded forms in the wild-type systems. (a) Cys57(ERp57)-Cys95(tapasin) in presence/absence of disulphide bond. (b) The residual fluctuations (RMSF) of each residue of ERp57 and tapasin in simulated disulphide bonded and non-bonded systems. (c) RMSD of all-atoms (excluding hydrogen atoms) of ERp57 and tapasin from simulated disulphide bonded and non-bonded systems. (d) Intermolecular interactions observed between ERp57-tapasin over 1000 ns of MD simulations. In the diagram, residues (interacting pairs) are colored according to their H-bonding occupancies (over 1000 ns).



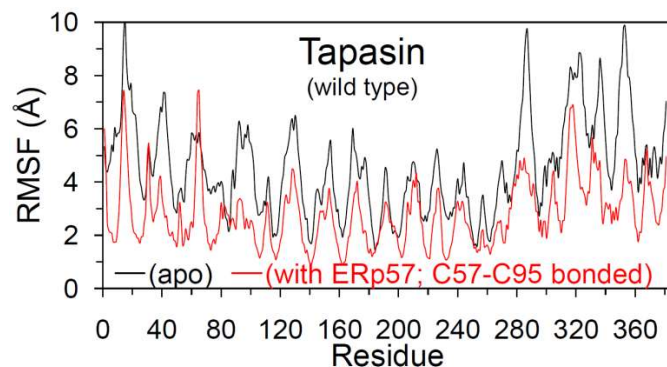

**Figure S3.** RMSF of the wild-type tapasin. RMSF plot based on the C $\alpha$  atoms of tapasin from 1000 ns MD simulations for the apo-form of tapasin, and when complexed with ERp57.

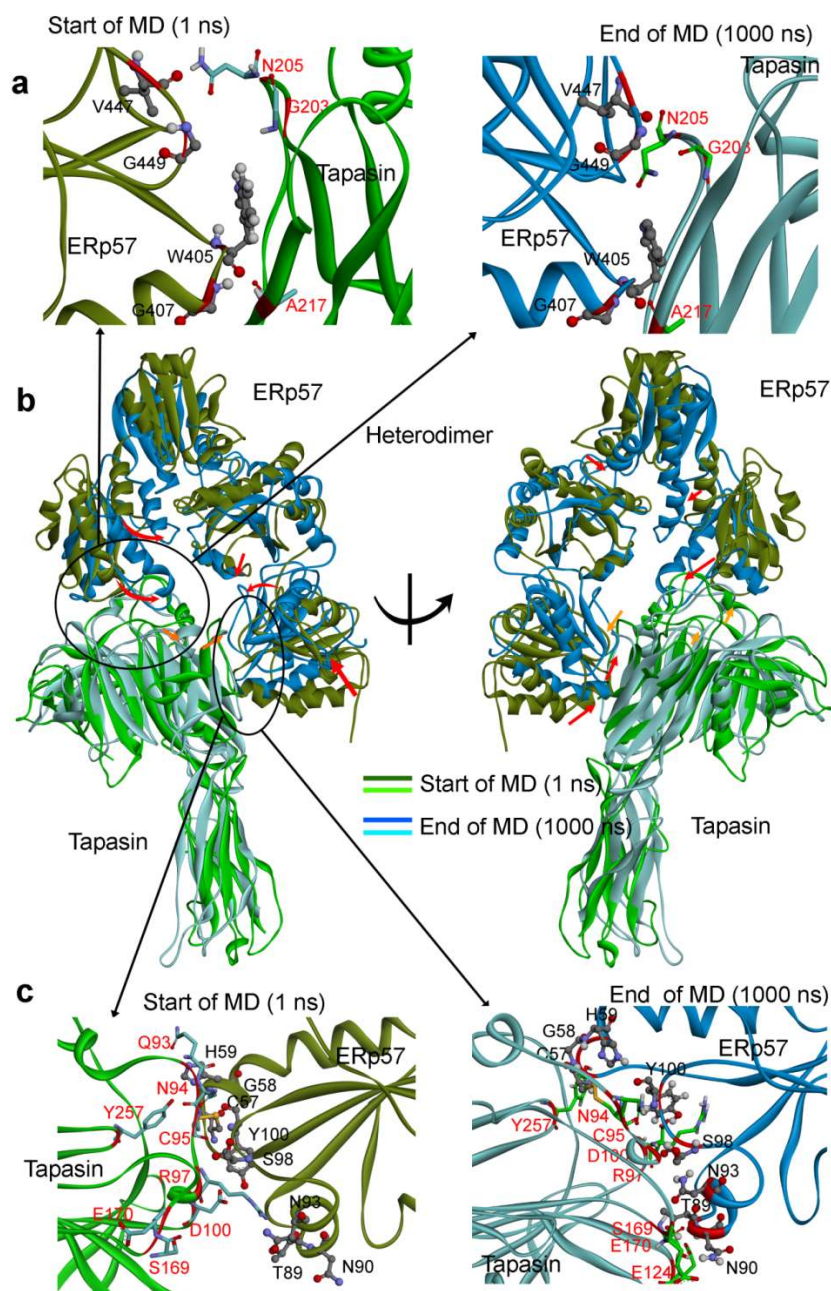

**Figure S4.** Structural change in the ERp57-tapasin (wild-type system), and protein-protein interactions from MD. (a and c) Conformational change in the residues involved with high occupancy interactions (Figure 4c) were traced, and labeled from the beginning (1 ns) and end (1000 ns) of the

MD simulations. (b) The structural change of the ERp57-tapasin complex obtained from the beginning (1 ns) and end (1000 ns) of the wild-type MD simulations. Arrow (red in ERp57 and orange in tapasin) represents movement of the ERp57 or tapasin region in pointed direction.

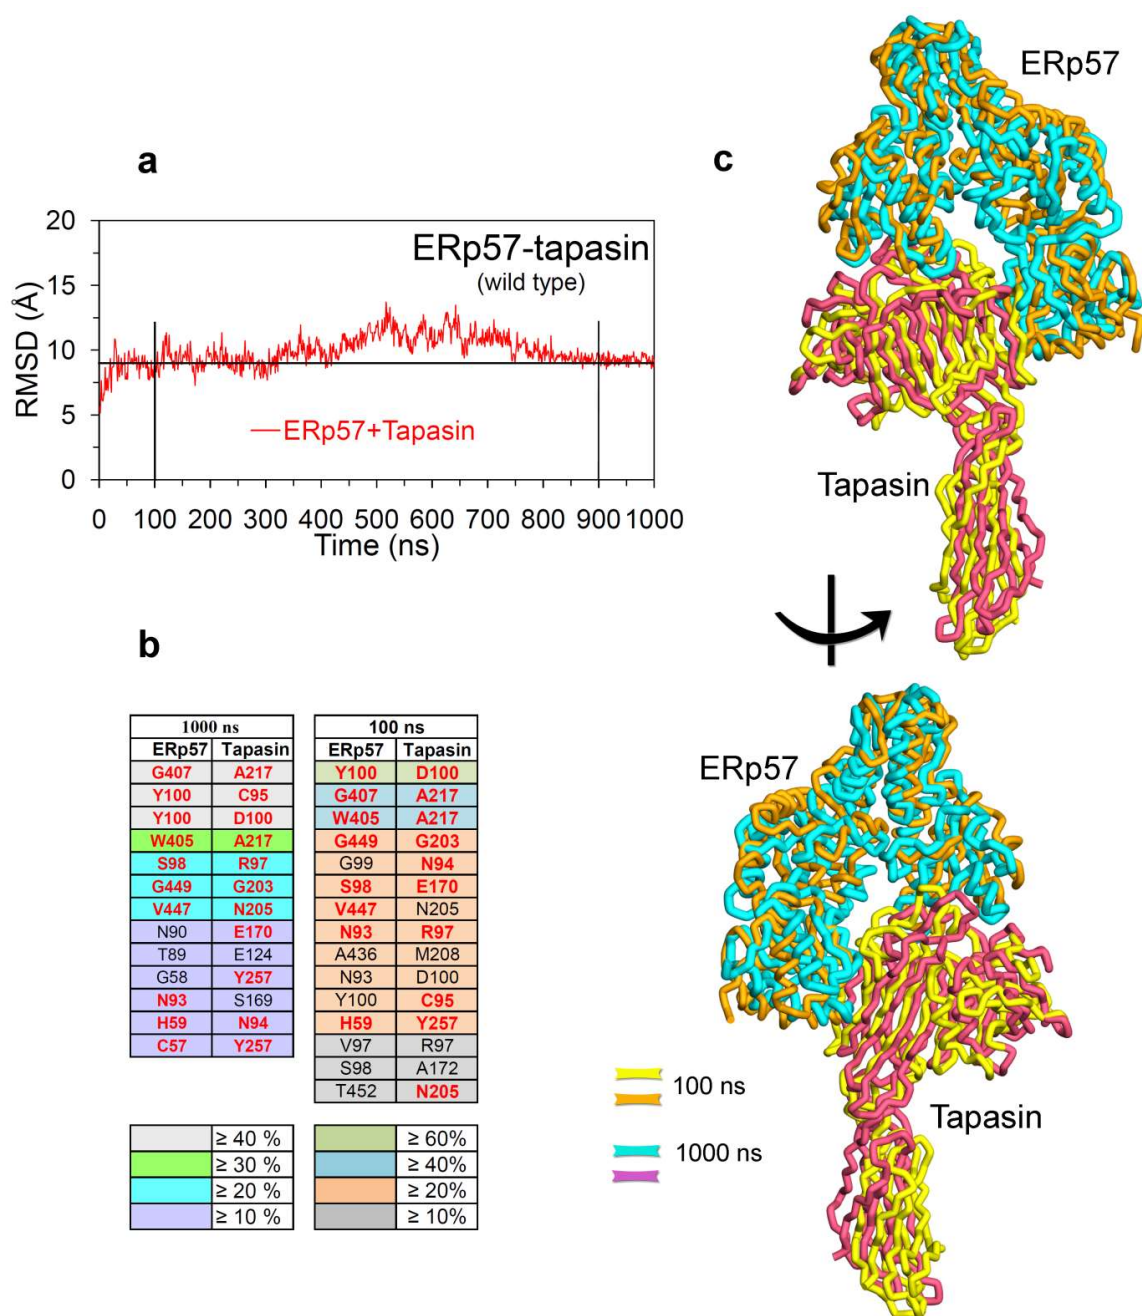

**Figure S5.** Extracted 100 ns trajectory from the wild-type MD simulations of 1000 ns, and used it as a representative to compare results with mutant systems (100 ns). (a) RMSDs (ERp57+tapasin) of the ERp57-tapasin for the wild-type complex. (b) H-bond interactions traced/extracted from the 1–100 ns and the 1–1000 ns simulation of the wild-type system. In the ERp57 protein, except for Gly58, Thr89, and Asn90 all other nine residues (Cys57, His59, Asn93, Ser98, Try100, Trp405, Gly407, Val447, and Gly449) were common in 100 ns and 1000 ns analysis. In addition, for the tapasin protein residues Asn94, Cys95, Arg97, Asp100, Glu170, Gly203, Asn205, Ala217, and Tyr257 were present in 100 ns as well as in 1000 ns (except for Glu124 and Ser169). The text in red represents common residues in both 100 ns and 1000 ns, and the background color represents the occupancy of particular H-Bond in 1–100 or 1–1000 ns. (c) Superimposed structures of the 100 ns and 1000 ns MD frames, suggest almost similar structural conformation.

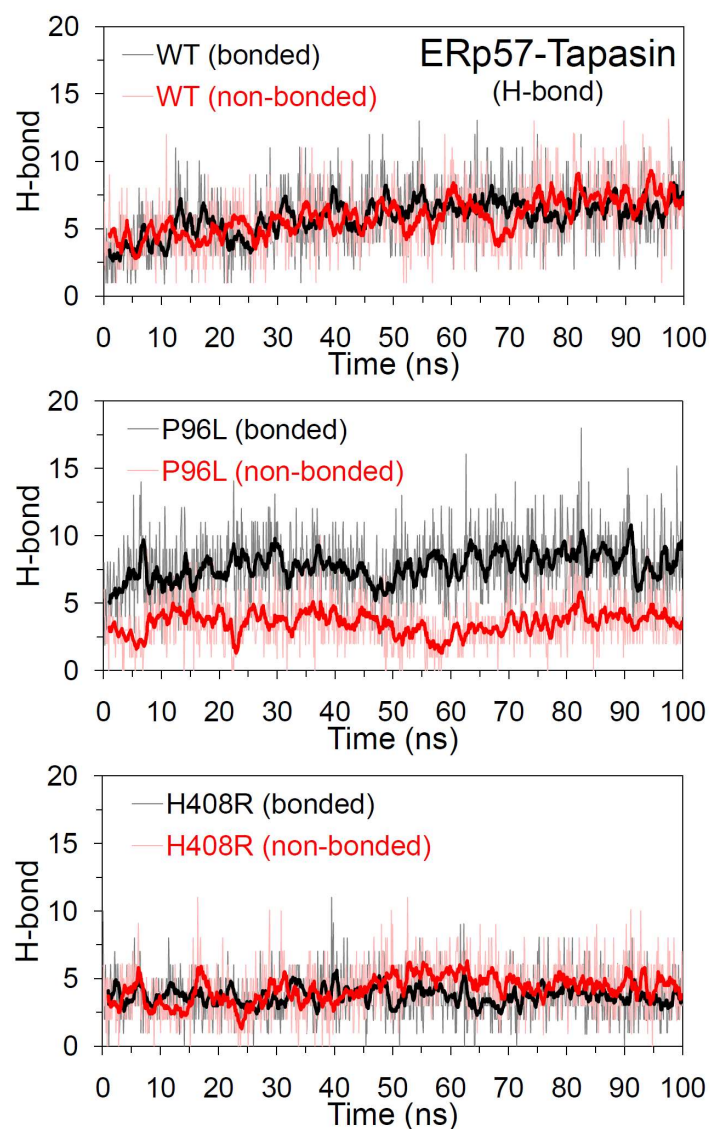

**Figure S6.** H-bond interactions from different disulphide bonded/non-bonded systems. Intermolecular interactions between ERp57-tapasin in presence/absence of disulphide bond between Cys57(ERp57)-Cys95(tapasin) during 100 ns of MD simulation. The dark lines represent trends with a moving average formed with a period of 1 ns (i.e., number of H-bonds averaged every 1000 ps).



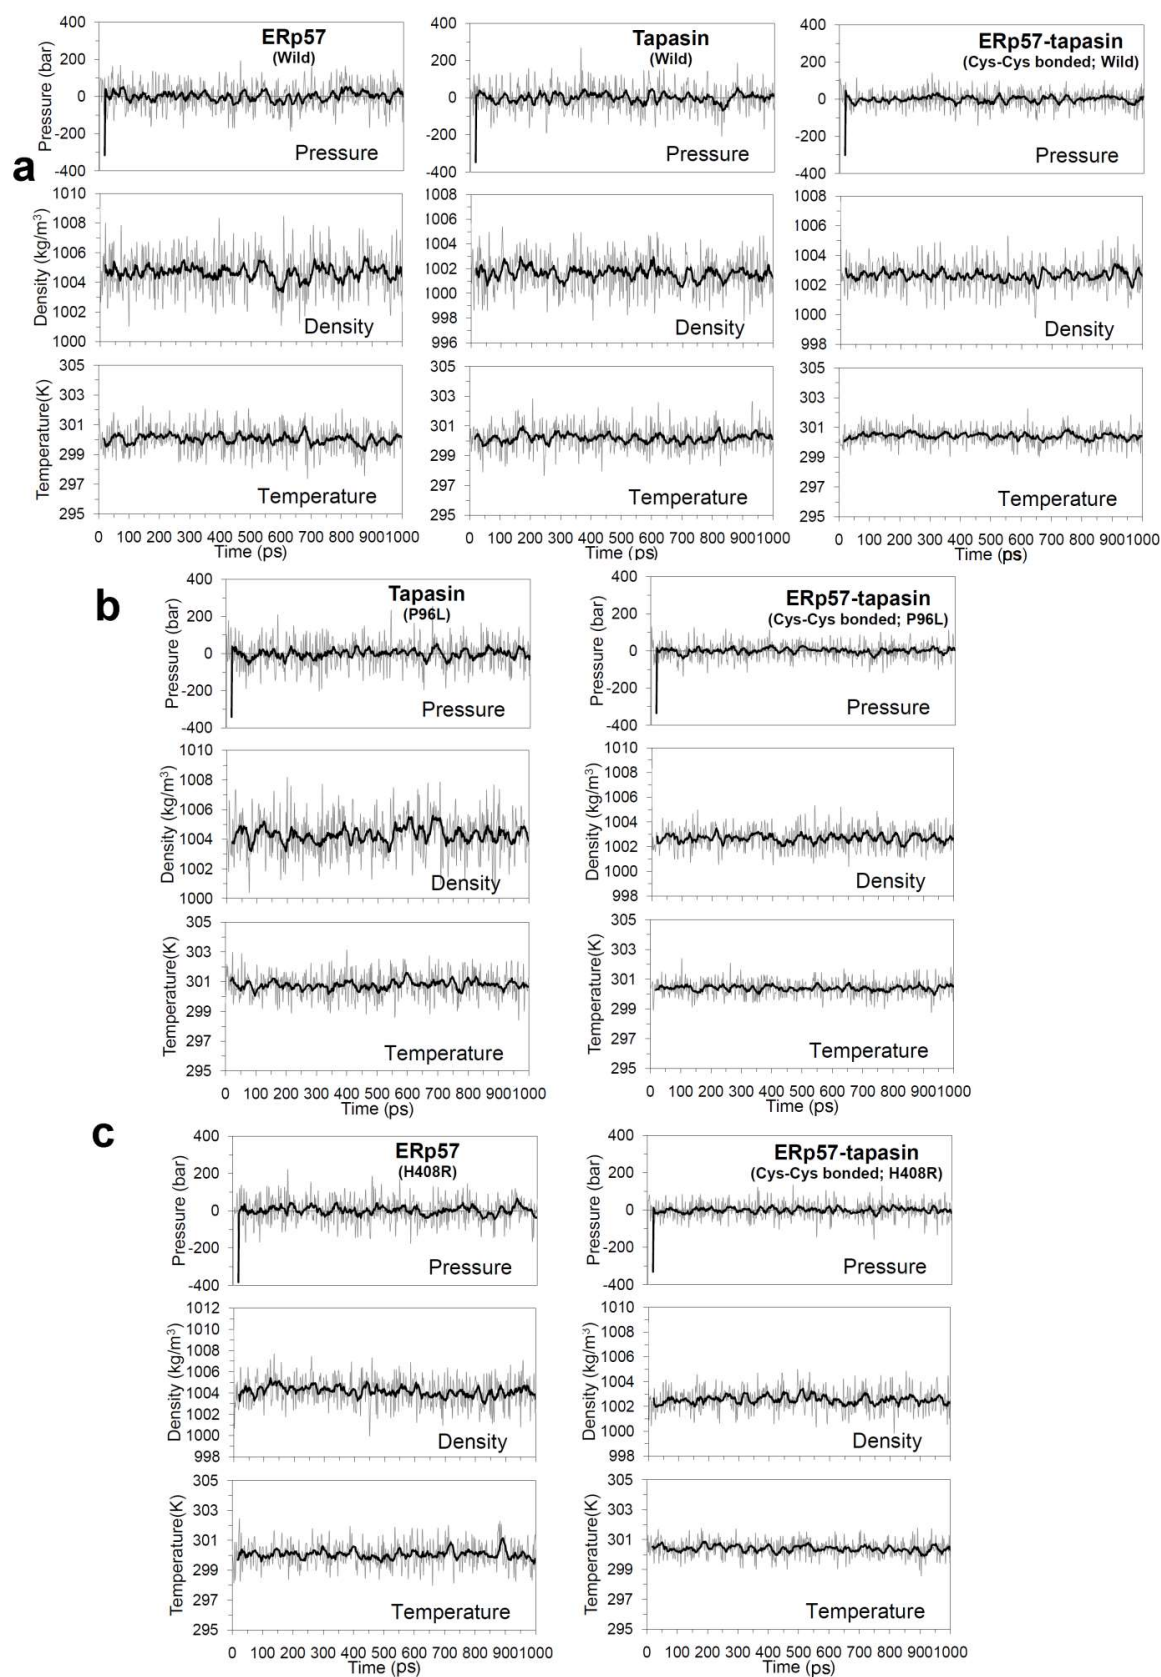

**Figure S7.** Properties of the equilibrated (1000 ps; 1 ns) wild-type and mutated systems using NPT ensemble (constant number of particles, pressure, and temperature). (**a**, **b**, and **c**) Wild-type, P96L, and H408R systems, respectively. For the ERp57-tapasin system results are presented for the Cys57(ERp57)-Cys95(tapasin) disulphide bonded system. The dark lines represent trends with a moving average with a period of 10 ps (i.e., number of values averaged every 10 ps).

**Table S1.** Residues involved in ERp57-tapasin binding (Cys57-Cys95 bonded/non-bonded). The intermolecular interactions between ERp57-tapasin in presence/absence of disulphide bond between Cys57-Cys95. Occupancy  $\geq 10\%$  (from 100 ns) are presented in this table.

| Wild-Type                                                  |         |         | ERp57-H408R |         |         | Tapasin-P96L |         |         |  |  |  |
|------------------------------------------------------------|---------|---------|-------------|---------|---------|--------------|---------|---------|--|--|--|
| Cys57-Cys95 disulphide bonded (ERp57-tapasin)              |         |         |             |         |         |              |         |         |  |  |  |
| ERp57                                                      | Tapasin | Occup.% | ERp57       | Tapasin | Occup.% | ERp57        | Tapasin | Occup.% |  |  |  |
| Y100                                                       | D100    | 61.08   | Y100        | C95     | 45.11   | Y100         | C95     | 75.74   |  |  |  |
| G407                                                       | A217    | 51.20   | G407        | A217    | 45.01   | G407         | A217    | 44.61   |  |  |  |
| W405                                                       | A217    | 44.31   | S98         | E170    | 29.44   | W405         | A217    | 43.41   |  |  |  |
| G449                                                       | G203    | 36.33   | S98         | R97     | 28.94   | Y100         | D100    | 42.61   |  |  |  |
| G99                                                        | N94     | 30.64   | G99         | N94     | 26.35   | H309         | S82     | 35.93   |  |  |  |
| S98                                                        | E170    | 30.24   | W405        | A217    | 22.16   | D440         | Q207    | 35.23   |  |  |  |
| V447                                                       | N205    | 27.15   | G58         | P78     | 15.67   | H59          | Q93     | 32.14   |  |  |  |
| N93                                                        | R97     | 26.75   | V97         | R97     | 13.37   | S98          | R97     | 30.54   |  |  |  |
| A436                                                       | M208    | 25.15   | C92         | R97     | 12.97   | G58          | P78     | 29.94   |  |  |  |
| N93                                                        | D100    | 24.75   | Y100        | D100    | 10.88   | H309         | S87     | 29.64   |  |  |  |
| Y100                                                       | C95     | 22.75   |             |         |         | T89          | D100    | 25.25   |  |  |  |
| H59                                                        | Y257    | 22.26   |             |         |         | V447         | N205    | 22.65   |  |  |  |
| V97                                                        | R97     | 15.27   |             |         |         | T437         | M208    | 16.17   |  |  |  |
| S98                                                        | A172    | 11.08   |             |         |         | A87          | A102    | 15.37   |  |  |  |
| T452                                                       | N205    | 10.48   |             |         |         | Y402         | E213    | 15.27   |  |  |  |
|                                                            |         |         |             |         |         | A436         | G206    | 13.97   |  |  |  |
|                                                            |         |         |             |         |         | P101         | N94     | 12.38   |  |  |  |
|                                                            |         |         |             |         |         | H59          | N94     | 12.18   |  |  |  |
|                                                            |         |         |             |         |         | S312         | S87     | 11.68   |  |  |  |
|                                                            |         |         |             |         |         | H309         | Q93     | 11.48   |  |  |  |
|                                                            |         |         |             |         |         | Y100         | A98     | 11.18   |  |  |  |
|                                                            |         |         |             |         |         | E446         | N205    | 10.18   |  |  |  |
| No disulphide bond between Cys57 and Cys95 (ERp57-tapasin) |         |         |             |         |         |              |         |         |  |  |  |
| G407                                                       | A217    | 42.61   | H59         | C95     | 47.31   | G58          | P78     | 40.32   |  |  |  |
| W405                                                       | A217    | 38.92   | W405        | A217    | 46.31   | W405         | A217    | 40.22   |  |  |  |
| R119                                                       | Q93     | 37.62   | A217        | G407    | 36.93   | Y402         | E213    | 29.44   |  |  |  |
| Y100                                                       | C95     | 31.94   | Y100        | C95     | 34.63   | R448         | N205    | 22.26   |  |  |  |
| Y100                                                       | D100    | 29.64   | R119        | N94     | 22.46   | W56          | L99     | 20.66   |  |  |  |
| D440                                                       | Q207    | 27.05   | R448        | W221    | 21.36   | D440         | Q207    | 18.06   |  |  |  |
| T437                                                       | M208    | 26.15   | Y454        | D224    | 18.16   | V447         | N205    | 13.77   |  |  |  |
| A438                                                       | Q207    | 23.45   | S443        | G178    | 14.37   | G407         | A217    | 10.68   |  |  |  |
| R448                                                       | W221    | 21.76   | N93         | D100    | 12.48   |              |         |         |  |  |  |
| S98                                                        | D100    | 17.37   | Y100        | D100    | 11.18   |              |         |         |  |  |  |
| D116                                                       | S174    | 15.07   | W405        | N205    | 10.28   |              |         |         |  |  |  |
| T437                                                       | N205    | 14.97   | V97         | R97     | 10.28   |              |         |         |  |  |  |
| V441                                                       | N205    | 14.17   |             |         |         |              |         |         |  |  |  |
| V447                                                       | G203    | 13.47   |             |         |         |              |         |         |  |  |  |
| R62                                                        | A92     | 13.27   |             |         |         |              |         |         |  |  |  |
| R119                                                       | N94     | 12.67   |             |         |         |              |         |         |  |  |  |
| G99                                                        | L99     | 11.28   |             |         |         |              |         |         |  |  |  |
| D116                                                       | N94     | 10.28   |             |         |         |              |         |         |  |  |  |

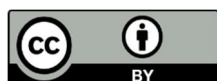

Supplement: s1 [file s1]
